# Supplementary material for: Whole-Genome Saliva and Blood DNA Methylation Profiling in Individuals with a Respiratory Allergy
Source: PubMed Central journal article supplement (PMC4801358; doi:10.1371/journal.pone.0151109), 2016-03-21
Supplement: pone.0151109.s008.pdf [file pone.0151109.s008.pdf]

# INGENUITY<sup>®</sup>

## PATHWAY ANALYSIS

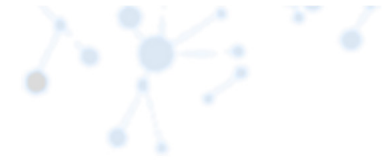

Analysis Name: list of genes blood vs saliva - 2015-08-05 03:56 PM  
Analysis Creation Date: 2015-08-05  
Build version: 346717M  
Content version: 24390178 (Release Date: 2015-06-17)

### Analysis Settings

Reference set: Ingenuity Knowledge Base (Genes Only)  
Relationship to include: Direct and Indirect  
Does not Include Endogenous Chemicals  
Optional Analyses: My Pathways My List

#### Filter Summary:

Consider only relationships where  
data sources = Ingenuity Expert Findings OR Ingenuity ExpertAssist Findings

**Top Canonical Pathways**

| Name                              | p-value  | Overlap        |
|-----------------------------------|----------|----------------|
| Molecular Mechanisms of Cancer    | 2.71E-21 | 51.2 % 187/365 |
| Integrin Signaling                | 6.24E-12 | 50.7 % 102/201 |
| Tec Kinase Signaling              | 6.62E-12 | 53.8 % 85/158  |
| T Cell Receptor Signaling         | 1.36E-11 | 60.8 % 59/97   |
| Leukocyte Extravasation Signaling | 1.44E-11 | 50.5 % 100/198 |

**Top Upstream Regulators**

| Upstream Regulator | p-value of overlap | Predicted Activation |
|--------------------|--------------------|----------------------|
| TNF                | 1.17E-53           |                      |
| TGFB1              | 3.24E-47           |                      |
| lipopolysaccharide | 9.10E-42           |                      |
| TP53               | 4.22E-38           |                      |
| camptothecin       | 3.46E-35           |                      |

**Top Diseases and Bio Functions****Diseases and Disorders**

| Name                                | p-value             | #Molecules |
|-------------------------------------|---------------------|------------|
| Cancer                              | 8.11E-11 - 3.20E-46 | 2040       |
| Organismal Injury and Abnormalities | 8.11E-11 - 3.20E-46 | 2011       |
| Inflammatory Response               | 7.88E-11 - 1.07E-38 | 1058       |
| Immunological Disease               | 6.02E-11 - 1.83E-36 | 938        |
| Connective Tissue Disorders         | 5.12E-11 - 1.74E-34 | 540        |

**Molecular and Cellular Functions**

| Name                              | p-value             | #Molecules |
|-----------------------------------|---------------------|------------|
| Cellular Movement                 | 7.88E-11 - 8.31E-80 | 1223       |
| Cellular Growth and Proliferation | 5.29E-11 - 4.94E-77 | 1848       |
| Cell Death and Survival           | 8.11E-11 - 1.35E-65 | 1739       |
| Cellular Development              | 6.24E-11 - 2.39E-57 | 1715       |
| Cellular Function and Maintenance | 6.24E-11 - 4.58E-49 | 1145       |

### Physiological System Development and Function

| Name                                          | p-value             | #Molecules |
|-----------------------------------------------|---------------------|------------|
| Immune Cell Trafficking                       | 7.88E-11 - 3.94E-55 | 723        |
| Hematological System Development and Function | 7.88E-11 - 2.86E-49 | 1095       |
| Tissue Morphology                             | 9.16E-12 - 7.04E-47 | 764        |
| Hematopoiesis                                 | 6.28E-11 - 2.45E-41 | 551        |
| Lymphoid Tissue Structure and Development     | 2.70E-11 - 2.49E-41 | 414        |

### Top Tox Functions

#### Assays: Clinical Chemistry and Hematology

| Name                                     | p-value             | #Molecules |
|------------------------------------------|---------------------|------------|
| Increased Levels of Alkaline Phosphatase | 6.26E-01 - 4.88E-04 | 34         |
| Increased Levels of Red Blood Cells      | 1.75E-03 - 1.75E-03 | 14         |
| Increased Levels of AST                  | 5.35E-01 - 2.07E-02 | 9          |
| Increased Levels of LDH                  | 2.97E-01 - 3.36E-02 | 11         |
| Increased Levels of Albumin              | 5.35E-01 - 4.36E-02 | 10         |

### Cardiotoxicity

| Name                        | p-value             | #Molecules |
|-----------------------------|---------------------|------------|
| Cardiac Necrosis/Cell Death | 6.26E-01 - 1.06E-10 | 119        |
| Cardiac Hypertrophy         | 6.26E-01 - 1.58E-09 | 149        |
| Cardiac Proliferation       | 4.81E-01 - 4.73E-06 | 44         |
| Cardiac Fibrosis            | 6.26E-01 - 1.52E-04 | 66         |
| Heart Failure               | 5.61E-01 - 1.07E-03 | 91         |

### Hepatotoxicity

| Name                     | p-value             | #Molecules |
|--------------------------|---------------------|------------|
| Liver Proliferation      | 6.26E-01 - 3.19E-10 | 99         |
| Liver Fibrosis           | 4.81E-01 - 7.49E-10 | 90         |
| Liver Damage             | 6.26E-01 - 3.18E-09 | 138        |
| Liver Steatosis          | 1.00E00 - 6.18E-07  | 93         |
| Hepatocellular Carcinoma | 2.80E-01 - 1.08E-06 | 188        |

### Nephrotoxicity

| Name                      | p-value             | #Molecules |
|---------------------------|---------------------|------------|
| Renal Necrosis/Cell Death | 4.30E-01 - 2.22E-18 | 220        |
| Renal Damage              | 4.81E-01 - 4.28E-06 | 88         |
| Renal Proliferation       | 6.26E-01 - 2.39E-05 | 102        |
| Kidney Failure            | 4.74E-01 - 7.81E-05 | 75         |
| Renal Dysfunction         | 2.19E-02 - 1.75E-03 | 14         |

### Top Networks

| ID | Associated Network Functions                                              | Score |
|----|---------------------------------------------------------------------------|-------|
| 1  | Molecular Transport, Small Molecule Biochemistry, Carbohydrate Metabolism | 21    |

|   |                                                                                                                     |    |
|---|---------------------------------------------------------------------------------------------------------------------|----|
| 2 | Cell-To-Cell Signaling and Interaction, Cellular Assembly and Organization, Nervous System Development and Function | 21 |
| 3 | Infectious Diseases, Nutritional Disease, Carbohydrate Metabolism                                                   | 21 |
| 4 | Amino Acid Metabolism, Small Molecule Biochemistry, Cell-To-Cell Signaling and Interaction                          | 19 |
| 5 | Cellular Development, Nervous System Development and Function, Cardiovascular System Development and Function       | 19 |

### Top Tox Lists

| Name                        | p-value  | Overlap        |
|-----------------------------|----------|----------------|
| Renal Necrosis/Cell Death   | 4.57E-18 | 46.0 % 228/496 |
| Cardiac Hypertrophy         | 2.78E-13 | 44.9 % 179/399 |
| Cardiac Necrosis/Cell Death | 4.79E-11 | 46.6 % 125/268 |
| Liver Proliferation         | 9.53E-11 | 48.0 % 109/227 |
| Increases Liver Damage      | 1.88E-09 | 55.7 % 59/106  |

### Top My Lists

| Name                       | p-value  | Overlap       |
|----------------------------|----------|---------------|
| Arylhydrocarbonreceptor    | 2.54E-04 | 42.2 % 57/135 |
| Androgen                   | 3.04E-04 | 43.6 % 48/110 |
| up_cluster cell activation | 1.05E-01 | 41.7 % 10/24  |
| Cell activation            | 3.07E-01 | 42.9 % 3/7    |
| New My List 1              | 3.13E-01 | 50.0 % 2/4    |

### Top My Pathways

| Name                                         | p-value  | Overlap       |
|----------------------------------------------|----------|---------------|
| Thesis Merelb                                | 1.17E-03 | 54.5 % 18/33  |
| Thesis Merel                                 | 5.92E-03 | 57.9 % 11/19  |
| NRF2-mediated Oxidative Stress Response_2013 | 6.83E-03 | 36.7 % 65/177 |

[RNALaterPath](#)

1.17E-02

61.5 % 8/13

[thesis M pathway brief](#)

4.38E-02

53.8 % 7/13
