# Supplementary material for: Whole-Genome Saliva and Blood DNA Methylation Profiling in Individuals with a Respiratory Allergy
Source: PubMed Central journal article supplement (PMC4801358; doi:10.1371/journal.pone.0151109), 2016-03-21
Supplement: pone.0151109.s009.pdf [file pone.0151109.s009.pdf]

# INGENUITY<sup>®</sup>

## PATHWAY ANALYSIS

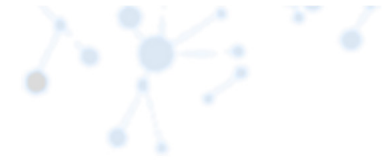

Analysis Name: list of genes RA vs C - 2015-08-07 11:12 AM  
Analysis Creation Date: 2015-08-07  
Build version: 346717M  
Content version: 24390178 (Release Date: 2015-06-17)

### Analysis Settings

Reference set: Ingenuity Knowledge Base (Genes Only)  
Relationship to include: Direct and Indirect  
Does not Include Endogenous Chemicals  
Optional Analyses: My Pathways My List

#### Filter Summary:

Consider only relationships where  
data sources = Ingenuity Expert Findings OR Ingenuity ExpertAssist Findings

### Top Canonical Pathways

| Name                                                 | p-value  | Overlap     |
|------------------------------------------------------|----------|-------------|
| Glutathione-mediated Detoxification                  | 1.87E-04 | 10.3 % 3/29 |
| Neuroprotective Role of THOP1 in Alzheimer's Disease | 4.90E-04 | 7.5 % 3/40  |
| LPS/IL-1 Mediated Inhibition of RXR Function         | 1.57E-03 | 2.3 % 5/219 |
| Aryl Hydrocarbon Receptor Signaling                  | 2.10E-03 | 2.9 % 4/140 |
| PXR/RXR Activation                                   | 2.21E-03 | 4.5 % 3/67  |

### Top Upstream Regulators

| Upstream Regulator | p-value of overlap | Predicted Activation |
|--------------------|--------------------|----------------------|
| SF3B2              | 2.52E-04           |                      |
| lead acetate       | 3.35E-04           |                      |
| POR                | 4.42E-04           |                      |
| CREB1              | 4.81E-04           |                      |
| KMT2A              | 7.65E-04           |                      |

### Top Diseases and Bio Functions

#### Diseases and Disorders

| Name                                | p-value             | #Molecules |
|-------------------------------------|---------------------|------------|
| Developmental Disorder              | 4.97E-02 - 1.45E-04 | 9          |
| Endocrine System Disorders          | 1.53E-02 - 1.45E-04 | 3          |
| Cancer                              | 4.94E-02 - 1.99E-03 | 20         |
| Gastrointestinal Disease            | 4.94E-02 - 1.99E-03 | 11         |
| Organismal Injury and Abnormalities | 4.97E-02 - 1.99E-03 | 26         |

#### Molecular and Cellular Functions

| Name                                   | p-value             | #Molecules |
|----------------------------------------|---------------------|------------|
| Drug Metabolism                        | 4.53E-02 - 5.98E-05 | 6          |
| Cell-To-Cell Signaling and Interaction | 3.41E-02 - 2.93E-03 | 8          |
| Cell Cycle                             | 4.89E-02 - 3.85E-03 | 5          |
| Cell Death and Survival                | 4.53E-02 - 3.85E-03 | 11         |
| Cell Morphology                        | 4.53E-02 - 3.85E-03 | 5          |

### Physiological System Development and Function

| Name                                           | p-value             | #Molecules |
|------------------------------------------------|---------------------|------------|
| Embryonic Development                          | 4.53E-02 - 1.68E-04 | 7          |
| Organismal Development                         | 4.91E-02 - 1.68E-04 | 12         |
| Tissue Development                             | 4.58E-02 - 1.68E-04 | 13         |
| Cardiovascular System Development and Function | 4.58E-02 - 1.05E-03 | 8          |
| Connective Tissue Development and Function     | 4.89E-02 - 1.49E-03 | 7          |

### Top Tox Functions

#### Assays: Clinical Chemistry and Hematology

| Name                        | p-value             | #Molecules |
|-----------------------------|---------------------|------------|
| Decreased Levels of Albumin | 4.89E-02 - 1.91E-02 | 2          |
| Increased Levels of LDH     | 5.63E-02 - 5.63E-02 | 1          |

#### Cardiotoxicity

| Name                   | p-value             | #Molecules |
|------------------------|---------------------|------------|
| Bradycardia            | 1.16E-01 - 1.16E-01 | 1          |
| Cardiac Arrhythmia     | 1.16E-01 - 1.16E-01 | 1          |
| Pulmonary Hypertension | 2.04E-01 - 2.04E-01 | 1          |
| Cardiac Proliferation  | 2.13E-01 - 2.13E-01 | 1          |

Cardiac Damage 2.49E-01 - 2.49E-01 1

### Hepatotoxicity

| Name                           | p-value             | #Molecules |
|--------------------------------|---------------------|------------|
| Glutathione Depletion In Liver | 5.98E-05 - 5.98E-05 | 3          |
| Liver Inflammation/Hepatitis   | 2.68E-01 - 3.85E-03 | 2          |
| Liver Damage                   | 2.29E-01 - 7.69E-03 | 2          |
| Liver Cholestasis              | 3.41E-02 - 3.41E-02 | 1          |
| Liver Fibrosis                 | 3.44E-01 - 3.44E-01 | 1          |

### Nephrotoxicity

| Name                      | p-value             | #Molecules |
|---------------------------|---------------------|------------|
| Renal Damage              | 5.99E-02 - 3.85E-03 | 4          |
| Kidney Failure            | 4.72E-02 - 3.80E-02 | 3          |
| Renal Tubule Injury       | 5.99E-02 - 5.00E-02 | 3          |
| Renal Necrosis/Cell Death | 1.00E00 - 8.14E-02  | 2          |
| Renal Proliferation       | 1.72E-01 - 1.72E-01 | 2          |

### Top Networks

| ID | Associated Network Functions                                             | Score |
|----|--------------------------------------------------------------------------|-------|
| 1  | Drug Metabolism, Glutathione Depletion In Liver, Embryonic Development   | 53    |
| 2  | Tissue Development, Cell Death and Survival, Cell Morphology             | 39    |
| 3  | Drug Metabolism, Molecular Transport, Nucleic Acid Metabolism            | 17    |
| 4  | Cellular Development, Cellular Growth and Proliferation, Cell Morphology | 11    |
| 5  | Developmental Disorder, Hereditary Disorder, Ophthalmic Disease          | 2     |

### Top Tox Lists

| Name                                         | p-value  | Overlap     |
|----------------------------------------------|----------|-------------|
| Glutathione Depletion - Phase II Reactions   | 5.98E-05 | 15.0 % 3/20 |
| Xenobiotic Metabolism Signaling              | 1.88E-03 | 1.8 % 6/336 |
| PXR/RXR Activation                           | 2.21E-03 | 4.5 % 3/67  |
| LPS/IL-1 Mediated Inhibition of RXR Function | 2.85E-03 | 2.0 % 5/251 |
| Aryl Hydrocarbon Receptor Signaling          | 3.48E-03 | 2.5 % 4/161 |

### Top My Lists

| Name                    | p-value  | Overlap     |
|-------------------------|----------|-------------|
| Arylhydrocarbonreceptor | 1.84E-03 | 3.0 % 4/135 |
| Androgen en estrogen    | 3.10E-01 | 1.0 % 1/96  |
| Androgen                | 3.47E-01 | 0.9 % 1/110 |

### Top My Pathways

| Name                                         | p-value  | Overlap     |
|----------------------------------------------|----------|-------------|
| AhR indirect interaction                     | 9.21E-05 | 13.0 % 3/23 |
| PXR indirect interaction                     | 9.43E-04 | 16.7 % 2/12 |
| NRF2-mediated Oxidative Stress Response_2013 | 3.10E-02 | 1.7 % 3/177 |
| CAR indirect interaction                     | 4.16E-02 | 9.1 % 1/11  |
